# Supplementary material for: Early generated B1 B cells with restricted BCRs become chronic lymphocytic leukemia with continued c-Myc and low Bmf expression
Source: PubMed Central journal article supplement — J Exp Med. 2016 Dec 12;213(13):3007–24. doi: 10.1084/jem.20160712 (PMC5154941; doi:10.1084/jem.20160712), 2016-12-12
Supplement: JEM_20160712_sm.pdf [file JEM_20160712_sm.pdf]

SUPPLEMENTAL MATERIAL

Hayakawa et al., <https://doi.org/10.1084/jem.20160712>

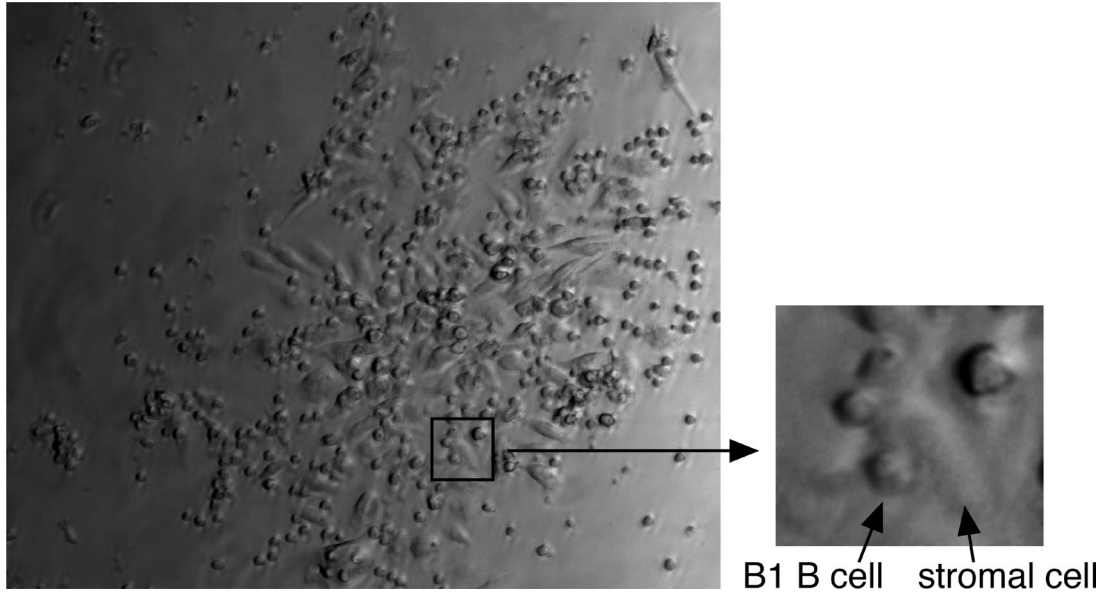

Figure S1. **B1 B-CLL cells interacting with stromal cells in spleen.** Photomicrography of the cultured (2 d) spleen cells of TC<sup>+</sup> mice at CLL stage (6 mo old). Round cells are the tumor CD5<sup>+</sup> B1 B cells interacting with stromal cells.

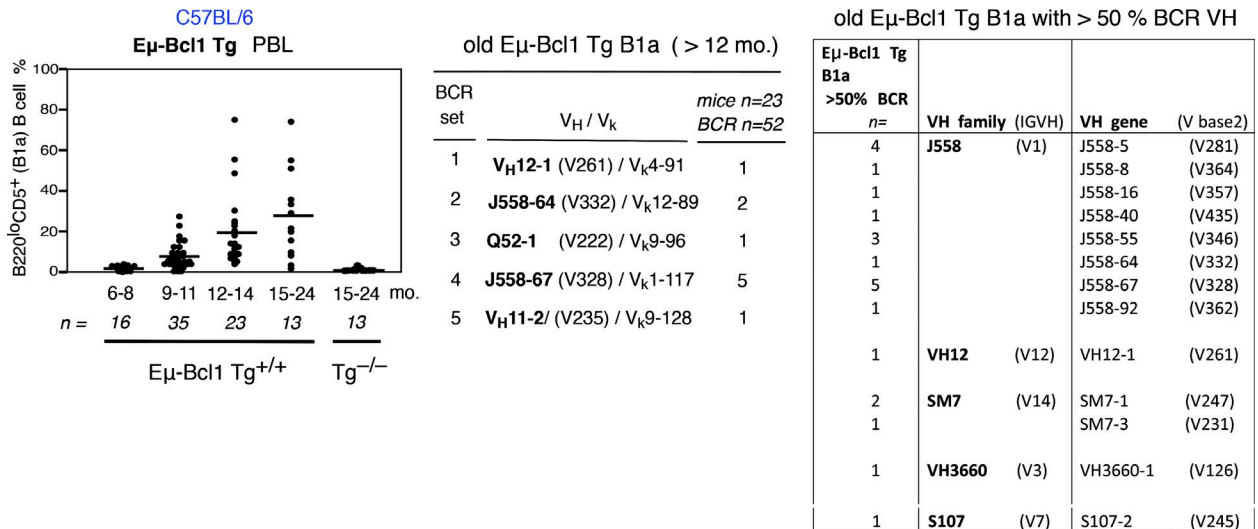

Figure S2. **CD5<sup>+</sup>B220<sup>lo</sup> B cell (B1a) increase in PBL of Eμ-Bcl-1 (cyclin D1) transgenic mice with aging, expressing BCRs including stereotyped BCRs and biased VHs as found in CLL.** PBL and B1a BCR analysis of Eμ-Bcl-1<sup>+/+</sup> transgenic mice (Bodrug et al., 1994) on C57BL/6 background. (left) Percentage of B1a B cells in PBL. Increased B1a population in aged mice, in contrast to C57BL/6 mice lacking the Eμ-Bcl-1 transgene, without significant increase of total PBL number. (middle and right) Summary of heavy chain sequence data of B1a cells in spleen of aged (>12 mo) Eμ-Bcl-1 transgenic mice. Although BCRs of most B1a cells in aged Eμ-Bcl-1 Tg mice were not monoclonal, 23 mice showed >50% identical VH usage (as increased cells) as listed in the right table (with CDR3 similar to TCL1<sup>+</sup> CLL data). In the total heavy chain data list (n = 52), the presence of VH/D/J of stereotyped BCRs, as found in TCL1<sup>+</sup> CLL, was identified by analysis of light chain sequence of the same mouse sample.

Table S1 lists mouse V<sub>H</sub> gene nomenclature. Table S2 lists BCR-stereotyped sets with HCDR3 and LCDR3 used by TC<sup>+</sup> CLLs (total 155 samples). Table S3 lists BCR-stereotyped sets with other V<sub>H</sub>/CDR3 used by TC<sup>+</sup> CLLs (total 155 samples). Tables S1–S3 are available as Excel files.

#### REFERENCE

Bodrug, S.E., B.J. Warner, M.L. Bath, G.J. Lindeman, A.W. Harris, and J.M. Adams. 1994. Cyclin D1 transgene impedes lymphocyte maturation and collaborates in lymphomagenesis with the myc gene. *EMBO J.* 13:2124–2130.
